# Supplementary material for: In Vivo Anti-Cancer Mechanism of Low-Molecular-Weight Fucosylated Chondroitin Sulfate (LFCS) from Sea Cucumber Cucumaria frondosa
Source: MDPI journal article supplement (doi:10.3390/molecules21050625), 2016-05-12
Supplement: s1 [file s1]

# Supplementary Materials: *In Vivo* Anti-Cancer Mechanism of Low-Molecular-Weight Fucosylated Chondroitin Sulfate (LFCS) from Sea Cucumber *Cucumaria frondosa*

Xiaoxiao Liu, Yong Liu, Jiejie Hao, Xiaoliang Zhao, Yinzhi Lang, Fei Fan, Chao Cai, Guoyun Li, Lijuan Zhang and Guangli Yu

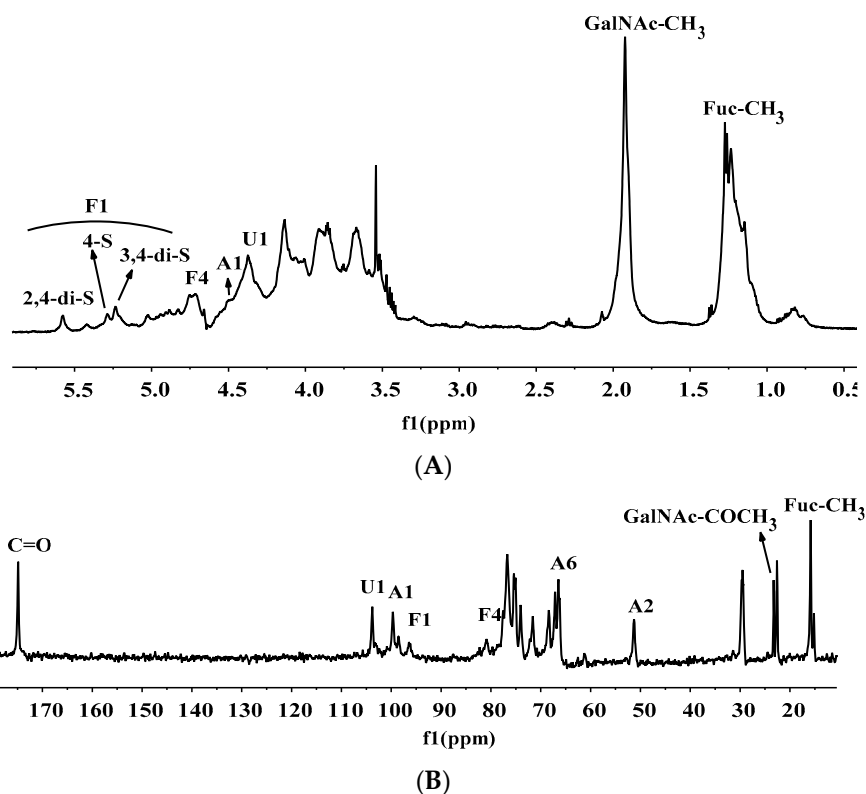

**Figure S1.** NMR spectra of LFCS. (A) <sup>1</sup>H-NMR spectrum of LFCS. 4-S, 4-O-sulfated fucose; 2,4-di-S, 2,4-disulfated fucose; 3,4-di-S, 3,4-disulfated fucose; F1, H1 signal of fucose; F4, H4 signal of fucose; A1, H1 signal of GalNAc; U1, H1 signal of GlcA; and (B) <sup>13</sup>C-NMR spectrum of LFCS. F1, C1 signal of fucose; F4, C4 signal of fucose; A1, C1 signal of GalNAc; A2, C2 signal of GalNAc; A6, C6 signal of GalNAc6S; U1, C1 signal of GlcA.
